# Supplementary material
Source: PubMed Central journal article supplement (PMC6806441)
Supplement: jama-322-1580-s001.pdf [file jama-322-1580-s001.pdf]

## Supplementary Online Content

Crump C, Winkleby MA, Sundquist J, Sundquist K. Prevalence of survival without major comorbidities among adults born prematurely. *JAMA*. doi:10.1001/jama.2019.15040

|                                                                                                                                                                  |    |
|------------------------------------------------------------------------------------------------------------------------------------------------------------------|----|
| <b>eTable 1.</b> <i>International Classification of Diseases (ICD) Codes for Diagnoses in the AYA HOPE Comorbidity Index</i>                                     | 2  |
| <b>eTable 2.</b> <i>International Classification of Diseases (ICD) Codes for Diagnoses in the Charlson Comorbidity Index (CCI)</i>                               | 3  |
| <b>eTable 3.</b> Unadjusted Prevalence Ratios for Survival Without Major Comorbidities in Adulthood by Gestational Age at Birth and Birth Year, Sweden           | 4  |
| <b>eTable 4.</b> Prevalence of Survival Without Major Comorbidities at Age 18 Years by Gestational Age at Birth and Birth Year, Sweden                           | 5  |
| <b>eTable 5.</b> Prevalence of AYA HOPE Comorbidity Index Diagnoses at Ages 18-43 Years by Gestational Age at Birth                                              | 6  |
| <b>eTable 6.</b> Prevalence of Charlson Comorbidity Index Diagnoses at Ages 18-43 Years by Gestational Age at Birth                                              | 8  |
| <b>eTable 7A.</b> Interactions Between Gestational Age at Birth and Sex in Relation to Survival Without Any AYA HOPE Comorbidities at Ages 18-43 Years           | 9  |
| <b>eTable 7B.</b> Interactions Between Gestational Age at Birth and Sex in Relation to Survival Without Any CCI Comorbidities at Ages 18-43 Years                | 10 |
| <b>eTable 8.</b> Co-sibling Analyses for Associations Between Gestational Age at Birth (1973-1997) and Survival Without Major Comorbidities Through 2015, Sweden | 11 |

This supplementary material has been provided by the authors to give readers additional information about their work.

**eTable 1. International Classification of Diseases (ICD) Codes for Diagnoses in the AYA HOPE Comorbidity Index**

| Comorbidity                       | ICD-8<br>(1973-1986) | ICD-9<br>(1987-1996) | ICD-10<br>(1997-2015)      |
|-----------------------------------|----------------------|----------------------|----------------------------|
| <b>Cardiovascular</b>             |                      |                      |                            |
| Hypertension                      | 400-404              | 401-405              | I10-I15                    |
| Ischemic heart disease            | 410-414              | 410-414              | I20-I25                    |
| Pericarditis                      | 420                  | 420                  | I30, I32                   |
| Other diseases of pericardium     | 423                  | 423                  | I31                        |
| Valve disorders                   | 424                  | 424                  | I34-I39                    |
| Arrhythmias                       | 427.2-427.9          | 427                  | I47-I49                    |
| Congestive heart failure          | 427.0-427.1          | 428                  | I11.0, I13.0, I13.2, I50   |
| Thromboembolic disease            | 444, 452-453         | 415.1, 444, 452-453  | I26, I81-I82               |
| Other peripheral vascular disease | 440-443, 445-448     | 440-443, 445-448     | I70-I79, K55, Z95.8, Z95.9 |
| <b>Endocrine</b>                  |                      |                      |                            |
| Diabetes mellitus                 | 250                  | 250                  | E10-E14                    |
| Thyroid disorders                 | 240-246              | 240-246              | E00-E07                    |
| Pituitary disorders               | 253                  | 253                  | E22-E23                    |
| Lipid disorders                   | 272                  | 272                  | E78                        |
| <b>Gastrointestinal</b>           |                      |                      |                            |
| Cholelithiasis                    | 574                  | 574                  | K80                        |
| Esophagitis                       | 530.1                | 530.1                | K20                        |
| Ulcer disease                     | 531-534              | 531-534              | K25-K28                    |
| Gastritis/colitis                 | 535, 561, 563        | 535, 555-556, 558    | K29, K50-K52               |
| Irritable bowel disease           | 564.1                | 564.1                | K58                        |
| Pancreatitis                      | 577.0-577.1          | 577.0-577.1          | K85-K86.1                  |
| <b>Hematologic</b>                |                      |                      |                            |
| Von Willebrand disease            | --                   | 286.4                | D68.0                      |
| Immune thrombocytopenic purpura   | --                   | 287.31               | D69.3                      |
| <b>Hepatic</b>                    |                      |                      |                            |
| Viral hepatitis                   | 070                  | 070                  | B15-B19                    |
| Non-alcoholic cirrhosis           | 571.8-571.9          | 571.5                | K74                        |
| Other non-alcoholic liver disease | 573                  | 571.8-571.9          | K71-K73, K75-K76           |
| <b>HIV/AIDS</b>                   |                      |                      |                            |
|                                   | --                   | 042                  | B20-B24                    |
| <b>Mental health</b>              |                      |                      |                            |
| Mood disorders                    | 296                  | 296, 311             | F30-F39                    |
| Anxiety disorders                 | 300.0                | 300.0                | F40-F41                    |
| Schizophrenia                     | 295                  | 295                  | F20                        |
| Attention deficit disorder        | --                   | 314.0                | F90                        |
| Mental delay                      | 310-315              | 317-319              | F70-F79                    |
| <b>Neurological</b>               |                      |                      |                            |
| Cerebrovascular disease           | 430-438              | 430-438              | I60-I69                    |
| Chronic pain                      | --                   | 338.2                | R52.1-R52.2                |
| Migraine headaches                | 346                  | 346                  | G43                        |
| Multiple sclerosis                | 340                  | 340                  | G35                        |
| Cerebral palsy                    | 343                  | 343                  | G80                        |
| Epilepsy                          | 345                  | 345                  | G40-G41                    |
| Peripheral neuropathy             | 357                  | 356                  | G60-G64                    |
| Specific developmental disorders  | --                   | 315                  | F80-F83                    |
| <b>Obesity</b>                    |                      |                      |                            |
|                                   | 277                  | 278.0                | E66                        |
| <b>Renal</b>                      |                      |                      |                            |
|                                   | 582-583              | 582-583, 585-587     | N00-N19, Z94.0             |
| <b>Respiratory</b>                |                      |                      |                            |
| Asthma                            | 493                  | 493                  | J45                        |
| COPD                              | 491-492              | 491-492, 494, 496    | J41-J44                    |
| <b>Rheumatologic/autoimmune</b>   |                      |                      |                            |
|                                   | 712, 716             | 710, 714, 725        | M05, M06, M31-M36          |

AYA HOPE = Adolescent and Young Adult Health Outcomes and Patient Experience

**eTable 2. International Classification of Diseases (ICD) Codes for Diagnoses in the Charlson Comorbidity Index (CCI)**

| Comorbidity                        | ICD-8<br>(1973-1986) | ICD-9<br>(1987-1996)           | ICD-10<br>(1997-2015)                                                                                             |
|------------------------------------|----------------------|--------------------------------|-------------------------------------------------------------------------------------------------------------------|
| 1. Myocardial infarction           | 410                  | 410, 412                       | I21, I22, I25.2                                                                                                   |
| 2. Congestive heart failure        | 427.0, 427.1         | 428                            | I11.0, I13.0, I13.2, I50                                                                                          |
| 3. Peripheral vascular disease     | 440-448              | 440-448, 557, 785.4            | I70-I79, K55, Z95.8, Z95.9                                                                                        |
| 4. Cerebrovascular disease         | 430-438              | 430-438                        | G45, G46, I60-I69                                                                                                 |
| 5. Dementia                        | 290                  | 290                            | F00-F03, F05.1, G30, G31.1                                                                                        |
| 6. Chronic pulmonary disease       | 490-493, 515-518     | 490-496, 500-505, 506.4, 770.7 | J40-J47, J60-J67, J68.4, J70.1, J70.3, P27                                                                        |
| 7. Connective tissue disease       | 712, 716             | 710, 714, 725                  | M05, M06, M31-M36                                                                                                 |
| 8. Ulcer disease                   | 531-534              | 531-534                        | K25-K28                                                                                                           |
| 9. Mild liver disease              | 571                  | 571                            | K70.0-K70.3, K70.9, K71.3-K71.5, K71.7, K73, K74, K76.0, K76.2-K76.4, K76.8, K76.9                                |
| 10. Diabetes                       | 250                  | 250-250.3, 250.7               | E10.0, E10.1, E10.6, E10.8-E11.1, E11.6, E11.8-E12.1, E12.6, E12.8-E13.1, E13.6, E13.8-E14.1, E14.6, E14.8, E14.9 |
| 11. Hemiplegia/paraplegia          | 343.0, 344.1-344.2   | 342, 344.1                     | G04.1, G11.4, G80.1, G80.2, G81, G82, G83.0-G83.4, G83.9                                                          |
| 12. Moderate/severe renal disease  | 582-583              | 582-583, 585-586, 588          | I12.0, I13.1, N03.2-N03.7, N05.2-N05.7, N18, N19, N25.0, Z49, Z94.0, Z99.2                                        |
| 13. Diabetes with end-organ damage | --                   | 250.4-250.6                    | E10.2-E10.5, E10.7, E11.2-E11.5, E11.7, E12.2-E12.5, E12.7, E13.2-E13.5, E13.7, E14.2-E14.5, E14.7                |
| 14. Any tumor                      | 140-172, 174-195     | 140-172, 174-195               | C00-C43, C45-C76, C97                                                                                             |
| 15. Leukemia                       | 203-209              | 203-208                        | C90-C96                                                                                                           |
| 16. Lymphoma                       | 200-202              | 200-202                        | C81-C88                                                                                                           |
| 17. Moderate/severe liver disease  | 456.0                | 456.0-456.2, 572.2-572.8       | I85, I86.4, I98.2, K70.4, K71.1, K72.1, K72.9, K76.5-K76.7                                                        |
| 18. Metastatic solid tumor         | 196-199              | 196-199                        | C77-C80                                                                                                           |
| 19. AIDS                           | --                   | 042                            | B20-B24                                                                                                           |

**eTable 3. Unadjusted Prevalence Ratios for Survival Without Major Comorbidities in Adulthood by Gestational Age at Birth and Birth Year, Sweden**

| Gestational age at birth                                              | Survival and AYA HOPE=0 <sup>a</sup> |                                      | Survival and CCI=0 <sup>b</sup> |                                      |
|-----------------------------------------------------------------------|--------------------------------------|--------------------------------------|---------------------------------|--------------------------------------|
|                                                                       | Unadjusted<br>PR (95% CI)            | Adjusted <sup>c</sup><br>PR (95% CI) | Unadjusted<br>PR (95% CI)       | Adjusted <sup>c</sup><br>PR (95% CI) |
| <b>All births in 1973-1997 (attained ages 18-43; median 29.8 yrs)</b> |                                      |                                      |                                 |                                      |
| Preterm (<37 wks)                                                     | 0.87 (0.86, 0.87)                    | 0.86 (0.85, 0.86)                    | 0.89 (0.89, 0.90)               | 0.89 (0.89, 0.89)                    |
| Extremely preterm (22-27 wks)                                         | 0.35 (0.34, 0.37)                    | 0.35 (0.33, 0.36)                    | 0.40 (0.38, 0.41)               | 0.39 (0.38, 0.41)                    |
| Very preterm (28-33 wks)                                              | 0.77 (0.76, 0.78)                    | 0.76 (0.75, 0.77)                    | 0.81 (0.80, 0.82)               | 0.81 (0.80, 0.81)                    |
| Late preterm (34-36 wks)                                              | 0.92 (0.92, 0.93)                    | 0.91 (0.91, 0.92)                    | 0.94 (0.94, 0.95)               | 0.94 (0.94, 0.94)                    |
| Early term (37-38 wks)                                                | 0.97 (0.97, 0.97)                    | 0.97 (0.96, 0.97)                    | 0.98 (0.98, 0.98)               | 0.98 (0.98, 0.98)                    |
| Full-term (39-41 wks)                                                 | Reference                            | Reference                            | Reference                       | Reference                            |
| Post-term (≥42 wks)                                                   | 0.99 (0.98, 0.99)                    | 1.00 (0.99, 1.00)                    | 1.00 (0.99, 1.00)               | 1.00 (1.00, 1.00)                    |
| Per additional week                                                   | 1.02 (1.02, 1.02)                    | 1.02 (1.02, 1.02)                    | 1.02 (1.02, 1.02)               | 1.02 (1.02, 1.02)                    |
| <b>Born in 1973-1979 (attained ages 36-43; median 39.7 yrs)</b>       |                                      |                                      |                                 |                                      |
| Preterm (<37 wks)                                                     | 0.85 (0.84, 0.86)                    | 0.84 (0.83, 0.85)                    | 0.88 (0.87, 0.88)               | 0.87 (0.87, 0.88)                    |
| Extremely preterm (22-27 wks)                                         | 0.25 (0.22, 0.29)                    | 0.25 (0.21, 0.28)                    | 0.26 (0.24, 0.30)               | 0.26 (0.23, 0.29)                    |
| Very preterm (28-33 wks)                                              | 0.71 (0.69, 0.73)                    | 0.69 (0.68, 0.71)                    | 0.76 (0.74, 0.77)               | 0.75 (0.74, 0.77)                    |
| Late preterm (34-36 wks)                                              | 0.92 (0.91, 0.93)                    | 0.91 (0.90, 0.92)                    | 0.94 (0.93, 0.95)               | 0.94 (0.93, 0.94)                    |
| Early term (37-38 wks)                                                | 0.98 (0.97, 0.98)                    | 0.96 (0.96, 0.97)                    | 0.99 (0.98, 0.99)               | 0.98 (0.98, 0.98)                    |
| Full-term (39-41 wks)                                                 | Reference                            | Reference                            | Reference                       | Reference                            |
| Post-term (≥42 wks)                                                   | 0.99 (0.98, 0.99)                    | 1.00 (1.00, 1.01)                    | 1.00 (0.99, 1.00)               | 1.00 (1.00, 1.00)                    |
| Per additional week                                                   | 1.02 (1.02, 1.02)                    | 1.02 (1.02, 1.02)                    | 1.02 (1.01, 1.02)               | 1.02 (1.02, 1.02)                    |
| <b>Born in 1980-1989 (attained ages 26-35; median 30.7 yrs)</b>       |                                      |                                      |                                 |                                      |
| Preterm (<37 wks)                                                     | 0.88 (0.87, 0.89)                    | 0.87 (0.87, 0.88)                    | 0.91 (0.90, 0.91)               | 0.91 (0.90, 0.91)                    |
| Extremely preterm (22-27 wks)                                         | 0.36 (0.33, 0.39)                    | 0.36 (0.33, 0.39)                    | 0.41 (0.38, 0.43)               | 0.41 (0.38, 0.43)                    |
| Very preterm (28-33 wks)                                              | 0.78 (0.77, 0.80)                    | 0.78 (0.76, 0.79)                    | 0.83 (0.82, 0.84)               | 0.83 (0.82, 0.83)                    |
| Late preterm (34-36 wks)                                              | 0.93 (0.92, 0.94)                    | 0.92 (0.91, 0.93)                    | 0.95 (0.95, 0.96)               | 0.95 (0.94, 0.95)                    |
| Early term (37-38 wks)                                                | 0.97 (0.97, 0.98)                    | 0.97 (0.96, 0.97)                    | 0.98 (0.98, 0.99)               | 0.98 (0.98, 0.99)                    |
| Full-term (39-41 wks)                                                 | Reference                            | Reference                            | Reference                       | Reference                            |
| Post-term (≥42 wks)                                                   | 0.99 (0.99, 1.00)                    | 0.99 (0.99, 1.00)                    | 1.00 (1.00, 1.00)               | 1.00 (1.00, 1.00)                    |
| Per additional week                                                   | 1.02 (1.02, 1.02)                    | 1.02 (1.02, 1.02)                    | 1.01 (1.01, 1.02)               | 1.02 (1.01, 1.02)                    |
| <b>Born in 1990-1997 (attained ages 18-25; median 22.5 yrs)</b>       |                                      |                                      |                                 |                                      |
| Preterm (<37 wks)                                                     | 0.86 (0.85, 0.86)                    | 0.85 (0.85, 0.86)                    | 0.89 (0.88, 0.89)               | 0.89 (0.88, 0.89)                    |
| Extremely preterm (22-27 wks)                                         | 0.39 (0.37, 0.42)                    | 0.39 (0.36, 0.41)                    | 0.45 (0.43, 0.48)               | 0.45 (0.43, 0.47)                    |
| Very preterm (28-33 wks)                                              | 0.79 (0.77, 0.80)                    | 0.78 (0.76, 0.79)                    | 0.83 (0.82, 0.84)               | 0.82 (0.81, 0.83)                    |
| Late preterm (34-36 wks)                                              | 0.91 (0.90, 0.92)                    | 0.90 (0.89, 0.91)                    | 0.93 (0.93, 0.94)               | 0.93 (0.92, 0.94)                    |
| Early term (37-38 wks)                                                | 0.96 (0.96, 0.96)                    | 0.96 (0.96, 0.96)                    | 0.98 (0.97, 0.98)               | 0.98 (0.97, 0.98)                    |
| Full-term (39-41 wks)                                                 | Reference                            | Reference                            | Reference                       | Reference                            |
| Post-term (≥42 wks)                                                   | 1.00 (0.99, 1.01)                    | 1.00 (0.99, 1.00)                    | 1.00 (1.00, 1.01)               | 1.00 (1.00, 1.01)                    |
| Per additional week                                                   | 1.02 (1.02, 1.02)                    | 1.02 (1.02, 1.02)                    | 1.02 (1.02, 1.02)               | 1.02 (1.02, 1.02)                    |

<sup>a</sup>Survival without any comorbidities in the AYA HOPE Comorbidity Index through 2015.

<sup>b</sup>Survival without any comorbidities in the Charlson Comorbidity Index through 2015.

<sup>c</sup>Adjusted for child characteristics (birth year, sex, fetal growth, multiple birth, birth order) and maternal characteristics (age, education, smoking, preeclampsia, other hypertensive disorders, diabetes).

AYA HOPE = Adolescent and Young Adult Health Outcomes and Patient Experience, CCI = Charlson Comorbidity Index, PR = prevalence ratio

**eTable 4. Prevalence of Survival Without Major Comorbidities at Age 18 Years by Gestational Age at Birth and Birth Year, Sweden**

| Gestational age at birth       | Total births | Alive at age 18 yrs | Survival and AYA HOPE=0 <sup>a</sup> |                          | Survival and CCI=0 <sup>b</sup> |                          |
|--------------------------------|--------------|---------------------|--------------------------------------|--------------------------|---------------------------------|--------------------------|
|                                | N            | %                   | %                                    | PR (95% CI) <sup>c</sup> | %                               | PR (95% CI) <sup>c</sup> |
| <b>All births in 1973-1997</b> | 2,566,699    | 99.1                | 85.5                                 |                          | 84.6                            |                          |
| Preterm (<37 wks)              | 149,065      | 94.2                | 76.6                                 | 0.89 (0.89, 0.89)        | 76.9                            | 0.90 (0.90, 0.90)        |
| Extremely preterm (22-27 wks)  | 5,391        | 51.3                | 31.4                                 | 0.37 (0.35, 0.38)        | 36.3                            | 0.42 (0.41, 0.44)        |
| Very preterm (28-33 wks)       | 33,025       | 89.5                | 68.4                                 | 0.80 (0.79, 0.80)        | 70.9                            | 0.83 (0.82, 0.83)        |
| Late preterm (34-36 wks)       | 110,649      | 97.7                | 81.3                                 | 0.94 (0.94, 0.95)        | 80.7                            | 0.94 (0.94, 0.95)        |
| Early term (37-38 wks)         | 447,249      | 99.1                | 84.0                                 | 0.98 (0.98, 0.98)        | 83.8                            | 0.98 (0.98, 0.98)        |
| Full-term (39-41 wks)          | 1,742,809    | 99.4                | 86.2                                 | Reference                | 85.3                            | Reference                |
| Post-term (≥42 wks)            | 227,576      | 99.3                | 88.1                                 | 1.00 (1.00, 1.00)        | 85.5                            | 1.00 (1.00, 1.00)        |
| Per additional week            |              |                     |                                      | 1.02 (1.02, 1.02)        |                                 | 1.02 (1.01, 1.02)        |
| <b>Born in 1973-1979</b>       | 699,473      | 98.8                | 94.9                                 |                          | 85.9                            |                          |
| Preterm (<37 wks)              | 35,636       | 91.1                | 85.8                                 | 0.90 (0.89, 0.90)        | 77.2                            | 0.89 (0.88, 0.89)        |
| Extremely preterm (22-27 wks)  | 1,155        | 30.0                | 26.6                                 | 0.28 (0.25, 0.30)        | 24.9                            | 0.29 (0.26, 0.32)        |
| Very preterm (28-33 wks)       | 7,869        | 81.3                | 74.5                                 | 0.78 (0.77, 0.79)        | 67.7                            | 0.78 (0.77, 0.79)        |
| Late preterm (34-36 wks)       | 26,612       | 96.6                | 91.7                                 | 0.96 (0.95, 0.96)        | 82.3                            | 0.95 (0.94, 0.95)        |
| Early term (37-38 wks)         | 98,895       | 98.8                | 94.6                                 | 0.99 (0.99, 0.99)        | 85.4                            | 0.98 (0.98, 0.99)        |
| Full-term (39-41 wks)          | 475,210      | 99.3                | 95.6                                 | Reference                | 86.6                            | Reference                |
| Post-term (≥42 wks)            | 89,732       | 99.2                | 95.4                                 | 1.00 (1.00, 1.00)        | 86.3                            | 1.00 (1.00, 1.01)        |
| Per additional week            |              |                     |                                      | 1.01 (1.01, 1.01)        |                                 | 1.02 (1.02, 1.02)        |
| <b>Born in 1980-1989</b>       | 989,229      | 99.1                | 89.6                                 |                          | 86.0                            |                          |
| Preterm (<37 wks)              | 60,203       | 94.7                | 82.1                                 | 0.91 (0.91, 0.91)        | 79.4                            | 0.91 (0.91, 0.92)        |
| Extremely preterm (22-27 wks)  | 1,957        | 50.9                | 35.6                                 | 0.39 (0.37, 0.42)        | 38.3                            | 0.44 (0.42, 0.47)        |
| Very preterm (28-33 wks)       | 12,760       | 90.2                | 73.9                                 | 0.82 (0.81, 0.83)        | 73.7                            | 0.85 (0.84, 0.86)        |
| Late preterm (34-36 wks)       | 45,486       | 97.9                | 86.4                                 | 0.96 (0.95, 0.96)        | 82.7                            | 0.95 (0.95, 0.96)        |
| Early term (37-38 wks)         | 186,892      | 99.2                | 88.8                                 | 0.98 (0.98, 0.99)        | 85.4                            | 0.98 (0.98, 0.99)        |
| Full-term (39-41 wks)          | 665,583      | 99.5                | 90.4                                 | Reference                | 86.7                            | Reference                |
| Post-term (≥42 wks)            | 76,551       | 99.3                | 90.7                                 | 1.00 (0.99, 1.00)        | 86.7                            | 1.00 (1.00, 1.00)        |
| Per additional week            |              |                     |                                      | 1.01 (1.01, 1.02)        |                                 | 1.01 (1.01, 1.01)        |
| <b>Born in 1990-1997</b>       | 877,997      | 99.3                | 73.1                                 |                          | 81.8                            |                          |
| Preterm (<37 wks)              | 53,226       | 95.7                | 64.2                                 | 0.86 (0.86, 0.87)        | 74.0                            | 0.89 (0.89, 0.90)        |
| Extremely preterm (22-27 wks)  | 2,279        | 62.5                | 30.2                                 | 0.40 (0.38, 0.43)        | 40.4                            | 0.48 (0.46, 0.51)        |
| Very preterm (28-33 wks)       | 12,396       | 94.0                | 58.8                                 | 0.79 (0.78, 0.80)        | 69.9                            | 0.84 (0.83, 0.85)        |
| Late preterm (34-36 wks)       | 38,551       | 98.3                | 68.0                                 | 0.91 (0.91, 0.92)        | 77.3                            | 0.93 (0.93, 0.94)        |
| Early term (37-38 wks)         | 161,462      | 99.3                | 71.9                                 | 0.97 (0.97, 0.97)        | 80.8                            | 0.98 (0.97, 0.98)        |
| Full-term (39-41 wks)          | 602,016      | 99.6                | 74.2                                 | Reference                | 82.7                            | Reference                |
| Post-term (≥42 wks)            | 61,293       | 99.5                | 74.1                                 | 1.00 (0.99, 1.00)        | 82.9                            | 1.00 (1.00, 1.01)        |
| Per additional week            |              |                     |                                      | 1.02 (1.02, 1.02)        |                                 | 1.02 (1.02, 1.02)        |

<sup>a</sup>Survival without any comorbidities in the AYA HOPE Comorbidity Index through age 18 years.

<sup>b</sup>Survival without any comorbidities in the Charlson Comorbidity Index through age 18 years.

<sup>c</sup>Adjusted for child characteristics (birth year, sex, fetal growth, multiple birth, birth order) and maternal characteristics (age, education, smoking, preeclampsia, other hypertensive disorders, diabetes).

AYA HOPE = Adolescent and Young Adult Health Outcomes and Patient Experience, CCI = Charlson Comorbidity Index, PR = prevalence ratio

**eTable 5. Prevalence of AYA HOPE Comorbidity Index Diagnoses at Ages 18-43 Years by Gestational Age at Birth**

| Comorbidity                       | Extremely preterm (22-27 wks) n (%) | Very preterm (28-33 wks) n (%) | Late preterm (34-36 wks) n (%) | Early term (37-38 wks) n (%) | Full-term (39-41 wks) n (%) | Post-term (≥42 wks) n (%) |
|-----------------------------------|-------------------------------------|--------------------------------|--------------------------------|------------------------------|-----------------------------|---------------------------|
| <b>Cardiovascular</b>             |                                     |                                |                                |                              |                             |                           |
| Hypertension                      | 208 (3.86)                          | 2,185 (6.62)                   | 7,716 (6.97)                   | 29,097 (6.51)                | 111,104 (6.37)              | 16,225 (7.13)             |
| Ischemic heart disease            | 2 (0.04)                            | 20 (0.06)                      | 109 (0.10)                     | 328 (0.07)                   | 1,238 (0.07)                | 209 (0.09)                |
| Pericarditis                      | 1 (0.02)                            | 19 (0.06)                      | 66 (0.06)                      | 290 (0.06)                   | 1,093 (0.06)                | 157 (0.07)                |
| Other diseases of pericardium     | 3 (0.06)                            | 9 (0.03)                       | 26 (0.02)                      | 63 (0.01)                    | 259 (0.01)                  | 34 (0.01)                 |
| Valve disorders                   | 11 (0.20)                           | 130 (0.39)                     | 316 (0.29)                     | 971 (0.22)                   | 3,287 (0.19)                | 466 (0.20)                |
| Arrhythmias                       | 59 (1.09)                           | 399 (1.21)                     | 1,350 (1.22)                   | 4,783 (1.07)                 | 18,380 (1.05)               | 2,628 (1.15)              |
| Congestive heart failure          | 40 (0.74)                           | 137 (0.41)                     | 261 (0.24)                     | 714 (0.16)                   | 2,087 (0.12)                | 346 (0.15)                |
| Thromboembolic disease            | 6 (0.11)                            | 45 (0.14)                      | 115 (0.10)                     | 401 (0.09)                   | 1,445 (0.08)                | 225 (0.10)                |
| Other peripheral vascular disease | 22 (0.41)                           | 206 (0.62)                     | 567 (0.51)                     | 2,470 (0.55)                 | 9,768 (0.56)                | 1,331 (0.58)              |
| <b>Endocrine</b>                  |                                     |                                |                                |                              |                             |                           |
| Diabetes mellitus                 | 55 (1.02)                           | 478 (1.45)                     | 1,933 (1.75)                   | 7,165 (1.60)                 | 25,370 (1.46)               | 3,718 (1.63)              |
| Thyroid disorders                 | 103 (1.91)                          | 1,092 (3.31)                   | 4,093 (3.70)                   | 15,515 (3.47)                | 60,815 (3.49)               | 9,145 (4.02)              |
| Pituitary disorders               | 46 (0.85)                           | 197 (0.60)                     | 497 (0.45)                     | 1,912 (0.43)                 | 6,155 (0.35)                | 893 (0.39)                |
| Lipid disorders                   | 38 (0.70)                           | 366 (1.11)                     | 1,227 (1.11)                   | 4,524 (1.01)                 | 17,240 (0.99)               | 2,753 (1.21)              |
| <b>Gastrointestinal</b>           |                                     |                                |                                |                              |                             |                           |
| Cholelithiasis                    | 20 (0.37)                           | 198 (0.60)                     | 659 (0.60)                     | 2,589 (0.58)                 | 9,948 (0.57)                | 1,588 (0.70)              |
| Esophagitis                       | 2 (0.04)                            | 22 (0.07)                      | 100 (0.09)                     | 300 (0.07)                   | 1,177 (0.07)                | 159 (0.07)                |
| Ulcer disease                     | 11 (0.20)                           | 89 (0.27)                      | 284 (0.26)                     | 1,057 (0.24)                 | 3,891 (0.22)                | 593 (0.26)                |
| Gastritis/colitis                 | 84 (1.56)                           | 856 (2.59)                     | 3,197 (2.89)                   | 12,754 (2.85)                | 46,892 (2.69)               | 6,157 (2.71)              |
| Irritable bowel disease           | 12 (0.22)                           | 115 (0.35)                     | 396 (0.36)                     | 1,799 (0.40)                 | 6,947 (0.40)                | 792 (0.35)                |
| Pancreatitis                      | 1 (0.02)                            | 8 (0.02)                       | 18 (0.02)                      | 90 (0.02)                    | 321 (0.02)                  | 53 (0.02)                 |
| <b>Hematologic</b>                |                                     |                                |                                |                              |                             |                           |
| Von Willebrand disease            | 1 (0.02)                            | 17 (0.05)                      | 44 (0.04)                      | 144 (0.03)                   | 602 (0.03)                  | 76 (0.03)                 |
| Immune thrombocytopenic purpura   | 1 (0.02)                            | 35 (0.11)                      | 90 (0.08)                      | 346 (0.08)                   | 1,296 (0.07)                | 175 (0.08)                |
| <b>Hepatic</b>                    |                                     |                                |                                |                              |                             |                           |
| Viral hepatitis                   | 16 (0.30)                           | 151 (0.46)                     | 515 (0.47)                     | 1,717 (0.38)                 | 5,994 (0.34)                | 966 (0.42)                |
| Non-alcoholic cirrhosis           | 0 (0.00)                            | 13 (0.04)                      | 44 (0.04)                      | 136 (0.03)                   | 430 (0.02)                  | 60 (0.03)                 |
| Other non-alcoholic liver disease | 11 (0.20)                           | 93 (0.28)                      | 356 (0.32)                     | 1,124 (0.25)                 | 4,161 (0.24)                | 600 (0.26)                |
| <b>HIV/AIDS</b>                   | 4 (0.07)                            | 8 (0.02)                       | 30 (0.03)                      | 99 (0.02)                    | 384 (0.02)                  | 65 (0.03)                 |

| <b>Comorbidity</b>                     | <b>Extremely preterm<br/>(22-27 wks)<br/>n (%)</b> | <b>Very preterm<br/>(28-33 wks)<br/>n (%)</b> | <b>Late preterm<br/>(34-36 wks)<br/>n (%)</b> | <b>Early term<br/>(37-38 wks)<br/>n (%)</b> | <b>Full-term<br/>(39-41 wks)<br/>n (%)</b> | <b>Post-term<br/>(≥42 wks)<br/>n (%)</b> |
|----------------------------------------|----------------------------------------------------|-----------------------------------------------|-----------------------------------------------|---------------------------------------------|--------------------------------------------|------------------------------------------|
| <b><u>Mental health</u></b>            |                                                    |                                               |                                               |                                             |                                            |                                          |
| Mood disorders                         | 284 (5.27)                                         | 2,366 (7.16)                                  | 7,879 (7.12)                                  | 31,645 (7.08)                               | 118,167 (6.78)                             | 15,666 (6.88)                            |
| Anxiety disorders                      | 274 (5.08)                                         | 2,365 (7.16)                                  | 7,700 (6.96)                                  | 30,640 (6.85)                               | 111,566 (6.40)                             | 14,242 (6.26)                            |
| Schizophrenia                          | 12 (0.22)                                          | 104 (0.31)                                    | 253 (0.23)                                    | 958 (0.21)                                  | 3,360 (0.19)                               | 497 (0.22)                               |
| Attention deficit disorder             | 245 (4.54)                                         | 1,358 (4.11)                                  | 4,012 (3.63)                                  | 15,176 (3.39)                               | 51,791 (2.97)                              | 6,292 (2.76)                             |
| Mental delay                           | 248 (4.60)                                         | 887 (2.69)                                    | 1,741 (1.57)                                  | 4,855 (1.09)                                | 12,987 (0.75)                              | 1,861 (0.82)                             |
| <b><u>Neurological</u></b>             |                                                    |                                               |                                               |                                             |                                            |                                          |
| Cerebrovascular disease                | 24 (0.45)                                          | 166 (0.50)                                    | 392 (0.35)                                    | 1,228 (0.27)                                | 4,543 (0.26)                               | 707 (0.31)                               |
| Chronic pain                           | 11 (0.20)                                          | 87 (0.26)                                     | 275 (0.25)                                    | 1,118 (0.25)                                | 4,112 (0.24)                               | 612 (0.27)                               |
| Migraine headaches                     | 39 (0.72)                                          | 610 (1.85)                                    | 2,311 (2.09)                                  | 9,656 (2.16)                                | 37,868 (2.17)                              | 4,919 (2.16)                             |
| Multiple sclerosis                     | 3 (0.06)                                           | 39 (0.12)                                     | 186 (0.17)                                    | 719 (0.16)                                  | 3,119 (0.18)                               | 479 (0.21)                               |
| Cerebral palsy                         | 287 (5.32)                                         | 1,151 (3.49)                                  | 713 (0.64)                                    | 1,296 (0.29)                                | 3,333 (0.19)                               | 602 (0.26)                               |
| Epilepsy                               | 183 (3.39)                                         | 897 (2.72)                                    | 2,040 (1.84)                                  | 6,656 (1.49)                                | 22,134 (1.27)                              | 3,138 (1.38)                             |
| Peripheral neuropathy                  | 8 (0.15)                                           | 41 (0.12)                                     | 173 (0.16)                                    | 677 (0.15)                                  | 2,408 (0.14)                               | 354 (0.16)                               |
| Specific developmental disorders       | 129 (2.39)                                         | 515 (1.56)                                    | 1,063 (0.96)                                  | 3,419 (0.76)                                | 10,059 (0.58)                              | 1,282 (0.56)                             |
| <b><u>Obesity</u></b>                  | 78 (1.45)                                          | 755 (2.29)                                    | 2,930 (2.65)                                  | 11,725 (2.62)                               | 44,473 (2.55)                              | 6,907 (3.04)                             |
| <b><u>Renal</u></b>                    | 68 (1.26)                                          | 652 (1.97)                                    | 2,208 (1.99)                                  | 8,707 (1.94)                                | 31,585 (1.81)                              | 4,057 (1.78)                             |
| <b><u>Respiratory</u></b>              |                                                    |                                               |                                               |                                             |                                            |                                          |
| Asthma                                 | 674 (12.50)                                        | 5,362 (16.24)                                 | 16,377 (14.80)                                | 60,319 (13.49)                              | 217,642 (12.49)                            | 27,519 (12.09)                           |
| COPD                                   | 107 (1.98)                                         | 264 (0.80)                                    | 465 (0.42)                                    | 1,361 (0.30)                                | 4,150 (0.24)                               | 477 (0.21)                               |
| <b><u>Rheumatologic/autoimmune</u></b> | 24 (0.45)                                          | 251 (0.76)                                    | 920 (0.83)                                    | 3,821 (0.85)                                | 14,728 (0.85)                              | 2,002 (0.88)                             |

AYA HOPE = Adolescent and Young Adult Health Outcomes and Patient Experience

**eTable 6. Prevalence of Charlson Comorbidity Index (CCI) Diagnoses at Ages 18-43 Years by Gestational Age at Birth**

| Comorbidity                          | Extremely preterm (22-27 wks) | Very preterm (28-33 wks) | Late preterm (34-36 wks) | Early term (37-38 wks) | Full-term (39-41 wks) | Post-term (≥42 wks) |
|--------------------------------------|-------------------------------|--------------------------|--------------------------|------------------------|-----------------------|---------------------|
|                                      | n (%)                         | n (%)                    | n (%)                    | n (%)                  | n (%)                 | n (%)               |
| 1. Myocardial infarction             | 1 (0.02)                      | 13 (0.04)                | 60 (0.05)                | 173 (0.04)             | 660 (0.04)            | 112 (0.05)          |
| 2. Congestive heart failure          | 40 (0.74)                     | 137 (0.41)               | 261 (0.24)               | 714 (0.16)             | 2,087 (0.12)          | 346 (0.15)          |
| 3. Peripheral vascular disease       | 27 (0.50)                     | 228 (0.69)               | 605 (0.55)               | 2,589 (0.58)           | 10,153 (0.58)         | 1,385 (0.61)        |
| 4. Cerebrovascular disease           | 26 (0.48)                     | 185 (0.56)               | 462 (0.42)               | 1,475 (0.33)           | 5,491 (0.32)          | 863 (0.38)          |
| 5. Dementia                          | 2 (0.04)                      | 6 (0.02)                 | 26 (0.02)                | 57 (0.01)              | 217 (0.01)            | 31 (0.01)           |
| 6. Chronic pulmonary disease         | 729 (13.52)                   | 5,593 (16.94)            | 16,836 (15.22)           | 61,621 (13.78)         | 221,683 (12.72)       | 28,058 (12.33)      |
| 7. Connective tissue disease         | 24 (0.45)                     | 251 (0.76)               | 920 (0.83)               | 3,821 (0.85)           | 14,728 (0.85)         | 2,002 (0.88)        |
| 8. Ulcer disease                     | 11 (0.20)                     | 89 (0.27)                | 284 (0.26)               | 1,057 (0.24)           | 3,891 (0.22)          | 593 (0.26)          |
| 9. Mild liver disease                | 7 (0.13)                      | 60 (0.18)                | 238 (0.22)               | 721 (0.16)             | 2,741 (0.16)          | 406 (0.18)          |
| 10. Diabetes                         | 54 (1.00)                     | 472 (1.43)               | 1,914 (1.73)             | 7,107 (1.59)           | 25,097 (1.44)         | 3,679 (1.62)        |
| 11. Hemiplegia                       | 229 (4.25)                    | 983 (2.98)               | 692 (0.63)               | 1,591 (0.36)           | 4,837 (0.28)          | 795 (0.35)          |
| 12. Moderate or severe renal disease | 27 (0.50)                     | 323 (0.98)               | 1,173 (1.06)             | 4,518 (1.01)           | 17,625 (1.01)         | 2,405 (1.06)        |
| 13. Diabetes with end-organ damage   | 5 (0.09)                      | 130 (0.39)               | 579 (0.52)               | 2,085 (0.47)           | 7,414 (0.43)          | 939 (0.41)          |
| 14. Any tumor                        | 24 (0.45)                     | 273 (0.72)               | 907 (0.82)               | 3,509 (0.78)           | 14,293 (0.82)         | 2,148 (0.94)        |
| 15. Leukemia                         | 3 (0.06)                      | 47 (0.14)                | 160 (0.14)               | 630 (0.14)             | 2,239 (0.13)          | 324 (0.14)          |
| 16. Lymphoma                         | 2 (0.04)                      | 38 (0.12)                | 122 (0.11)               | 498 (0.11)             | 2,099 (0.12)          | 304 (0.13)          |
| 17. Moderate or severe liver disease | 0 (0.00)                      | 17 (0.05)                | 53 (0.05)                | 154 (0.03)             | 593 (0.03)            | 85 (0.04)           |
| 18. Metastatic solid tumor           | 5 (0.09)                      | 47 (0.14)                | 181 (0.16)               | 660 (0.15)             | 2,679 (0.15)          | 419 (0.18)          |
| 19. AIDS                             | 4 (0.07)                      | 8 (0.02)                 | 30 (0.03)                | 99 (0.02)              | 384 (0.02)            | 65 (0.03)           |

**eTable 7A. Interactions Between Gestational Age at Birth and Sex in Relation to Survival Without Any AYA HOPE Comorbidities at Ages 18-43 Years**

|                                                            | Gestational age at birth |                          |                                          |                          |                                          |                          | PRs for early term vs. full-term within sex strata | PRs for preterm vs. full-term within sex strata |
|------------------------------------------------------------|--------------------------|--------------------------|------------------------------------------|--------------------------|------------------------------------------|--------------------------|----------------------------------------------------|-------------------------------------------------|
|                                                            | Full-term (39-41 wks)    |                          | Early term (37-38 wks)                   |                          | Preterm (<37 wks)                        |                          |                                                    |                                                 |
|                                                            | Prev.                    | PR (95% CI) <sup>a</sup> | Prev.                                    | PR (95% CI) <sup>a</sup> | Prev.                                    | PR (95% CI) <sup>a</sup> |                                                    |                                                 |
| <b>Sex</b>                                                 |                          |                          |                                          |                          |                                          |                          |                                                    |                                                 |
| Male                                                       | 68.2%                    | Reference                | 66.1%                                    | 0.97 (0.96, 0.97)        | 58.6%                                    | 0.86 (0.85, 0.86)        | 0.97 (0.96, 0.97)                                  | 0.86 (0.85, 0.86)                               |
| Female                                                     | 57.7%                    | 0.85 (0.84, 0.85)        | 55.8%                                    | 0.82 (0.81, 0.82)        | 49.9%                                    | 0.73 (0.72, 0.73)        | 0.96 (0.96, 0.97)                                  | 0.86 (0.86, 0.87)                               |
| PRs for female vs. male within gestational age strata      |                          | 0.85 (0.84, 0.85)        |                                          | 0.84 (0.84, 0.85)        |                                          | 0.85 (0.84, 0.86)        |                                                    |                                                 |
| Interaction on additive scale: RERI (95% CI)               |                          |                          | 0.003 (-0.002, 0.007);<br><i>P</i> =0.28 |                          | 0.027 (0.020, 0.035);<br><i>P</i> <0.001 |                          |                                                    |                                                 |
| Interaction on multiplicative scale: Ratio of PRs (95% CI) |                          |                          | 0.997 (0.992, 1.002);<br><i>P</i> =0.26  |                          | 1.007 (0.997, 1.017);<br><i>P</i> =0.15  |                          |                                                    |                                                 |

<sup>a</sup>Adjusted for child characteristics (birth year, fetal growth, multiple birth, birth order) and maternal characteristics (age, education, smoking, preeclampsia, other hypertensive disorders, diabetes).

AYA HOPE = Adolescent and Young Adult Health Outcomes and Patient Experience, PR = prevalence ratio, Prev. = prevalence of survival without major comorbidities (AYA HOPE score = 0), RERI = relative excess risk due to interaction

**eTable 7B. Interactions Between Gestational Age at Birth and Sex in Relation to Survival Without Any CCI Comorbidities at Ages 18-43 Years**

|                                                            | Gestational age at birth |                          |                                         |                          |                                          |                          | PRs for early term vs. full-term within sex strata | PRs for preterm vs. full-term within sex strata |
|------------------------------------------------------------|--------------------------|--------------------------|-----------------------------------------|--------------------------|------------------------------------------|--------------------------|----------------------------------------------------|-------------------------------------------------|
|                                                            | Full-term (39-41 wks)    |                          | Early term (37-38 wks)                  |                          | Preterm (<37 wks)                        |                          |                                                    |                                                 |
|                                                            | Prev.                    | PR (95% CI) <sup>a</sup> | Prev.                                   | PR (95% CI) <sup>a</sup> | Prev.                                    | PR (95% CI) <sup>a</sup> |                                                    |                                                 |
| <b>Sex</b>                                                 |                          |                          |                                         |                          |                                          |                          |                                                    |                                                 |
| Male                                                       | 83.1%                    | Reference                | 81.5%                                   | 0.98 (0.98, 0.98)        | 73.7%                                    | 0.89 (0.88, 0.89)        | 0.98 (0.98, 0.98)                                  | 0.89 (0.88, 0.89)                               |
| Female                                                     | 80.5%                    | 0.97 (0.97, 0.97)        | 79.2%                                   | 0.95 (0.95, 0.95)        | 72.4%                                    | 0.87 (0.87, 0.87)        | 0.98 (0.98, 0.98)                                  | 0.90 (0.89, 0.90)                               |
| PRs for female vs. male within gestational age strata      |                          | 0.97 (0.97, 0.97)        |                                         | 0.97 (0.97, 0.97)        |                                          | 0.98 (0.98, 0.99)        |                                                    |                                                 |
| Interaction on additive scale: RERI (95% CI)               |                          |                          | 0.003 (0.000, 0.006);<br><i>P</i> =0.07 |                          | 0.016 (0.010, 0.021);<br><i>P</i> <0.001 |                          |                                                    |                                                 |
| Interaction on multiplicative scale: Ratio of PRs (95% CI) |                          |                          | 1.002 (0.999, 1.006);<br><i>P</i> =0.16 |                          | 1.014 (1.008, 1.021);<br><i>P</i> <0.001 |                          |                                                    |                                                 |

<sup>a</sup>Adjusted for child characteristics (birth year, fetal growth, multiple birth, birth order) and maternal characteristics (age, education, smoking, preeclampsia, other hypertensive disorders, diabetes).

CCI = Charlson Comorbidity Index, PR = prevalence ratio, Prev. = prevalence of survival without major comorbidities (CCI score = 0), RERI = relative excess risk due to interaction

**eTable 8. Co-sibling Analyses for Association Between Gestational Age at Birth (1973-1997) and Survival Without Major Comorbidities Through 2015, Sweden**

|                                                                 | N         | Survival and AYA HOPE=0 <sup>a</sup> |        | Survival and CCI=0 <sup>b</sup> |        |
|-----------------------------------------------------------------|-----------|--------------------------------------|--------|---------------------------------|--------|
|                                                                 |           | PR (95% CI) <sup>c</sup>             | P      | PR (95% CI) <sup>c</sup>        | P      |
| <b>Born in 1973-1997 (attained ages 18-43; median 29.8 yrs)</b> | 2,169,233 |                                      |        |                                 |        |
| Preterm (<37 wks)                                               | 125,040   | 0.88 (0.87, 0.88)                    | <0.001 | 0.89 (0.89, 0.90)               | <0.001 |
| Early term (37-38 wks)                                          | 381,028   | 0.98 (0.98, 0.99)                    | <0.001 | 0.99 (0.99, 0.99)               | <0.001 |
| Full-term (39-41 wks)                                           | 1,477,782 | Reference                            |        | Reference                       |        |
| Post-term (≥42 wks)                                             | 185,383   | 1.00 (0.99, 1.00)                    | 0.34   | 1.00 (1.00, 1.00)               | 0.31   |
| Per additional week                                             |           | 1.02 (1.02, 1.02)                    | <0.001 | 1.02 (1.02, 1.02)               | <0.001 |
| <b>Born in 1973-1979 (attained ages 36-43; median 39.7 yrs)</b> | 476,191   |                                      |        |                                 |        |
| Preterm (<37 wks)                                               | 24,818    | 0.82 (0.80, 0.84)                    | <0.001 | 0.83 (0.82, 0.85)               | <0.001 |
| Early term (37-38 wks)                                          | 66,183    | 0.98 (0.96, 0.99)                    | <0.001 | 0.98 (0.97, 0.99)               | <0.001 |
| Full-term (39-41 wks)                                           | 322,684   | Reference                            |        | Reference                       |        |
| Post-term (≥42 wks)                                             | 62,506    | 1.00 (0.99, 1.02)                    | 0.54   | 1.01 (1.00, 1.02)               | 0.06   |
| Per additional week                                             |           | 1.03 (1.03, 1.03)                    | <0.001 | 1.03 (1.03, 1.03)               | <0.001 |
| <b>Born in 1980-1989 (attained ages 26-35; median 30.7 yrs)</b> | 893,679   |                                      |        |                                 |        |
| Preterm (<37 wks)                                               | 52,742    | 0.88 (0.87, 0.89)                    | <0.001 | 0.90 (0.89, 0.91)               | <0.001 |
| Early term (37-38 wks)                                          | 167,956   | 0.99 (0.98, 1.00)                    | 0.02   | 0.99 (0.99, 0.99)               | 0.001  |
| Full-term (39-41 wks)                                           | 604,648   | Reference                            |        | Reference                       |        |
| Post-term (≥42 wks)                                             | 68,333    | 0.99 (0.98, 1.00)                    | 0.08   | 1.00 (0.99, 1.01)               | 0.88   |
| Per additional week                                             |           | 1.02 (1.02, 1.02)                    | <0.001 | 1.02 (1.02, 1.02)               | <0.001 |
| <b>Born in 1990-1997 (attained ages 18-25; median 22.5 yrs)</b> | 799,363   |                                      |        |                                 |        |
| Preterm (<37 wks)                                               | 47,480    | 0.87 (0.85, 0.88)                    | <0.001 | 0.88 (0.88, 0.89)               | <0.001 |
| Early term (37-38 wks)                                          | 146,889   | 0.98 (0.97, 0.99)                    | <0.001 | 0.98 (0.98, 0.99)               | <0.001 |
| Full-term (39-41 wks)                                           | 550,450   | Reference                            |        | Reference                       |        |
| Post-term (≥42 wks)                                             | 54,544    | 1.00 (0.99, 1.01)                    | 0.90   | 1.00 (0.99, 1.01)               | 0.97   |
| Per additional week                                             |           | 1.03 (1.02, 1.03)                    | <0.001 | 1.02 (1.02, 1.02)               | <0.001 |

<sup>a</sup>Survival without any comorbidities in the AYA HOPE Comorbidity Index through 2015.

<sup>b</sup>Survival without any comorbidities in the Charlson Comorbidity Index through 2015.

<sup>c</sup>Adjusted for shared familial (genetic and/or environmental) factors, and additionally for specific child characteristics (birth year, sex, fetal growth, multiple birth, birth order) and maternal characteristics (age, education, smoking, preeclampsia, other hypertensive disorders, diabetes).

AYA HOPE = Adolescent and Young Adult Health Outcomes and Patient Experience, CCI = Charlson Comorbidity Index, PR = prevalence ratio
